# Supplementary material for: Phylogenomic and comparative analyses of Coffeeae alliance (Rubiaceae): deep insights into phylogenetic relationships and plastome evolution
Source: PubMed Central journal article supplement (PMC8881883; doi:10.1186/s12870-022-03480-5), 2022-02-26
Supplement: 12870_2022_3480_MOESM1_ESM.pdf [file 12870_2022_3480_MOESM1_ESM.pdf]

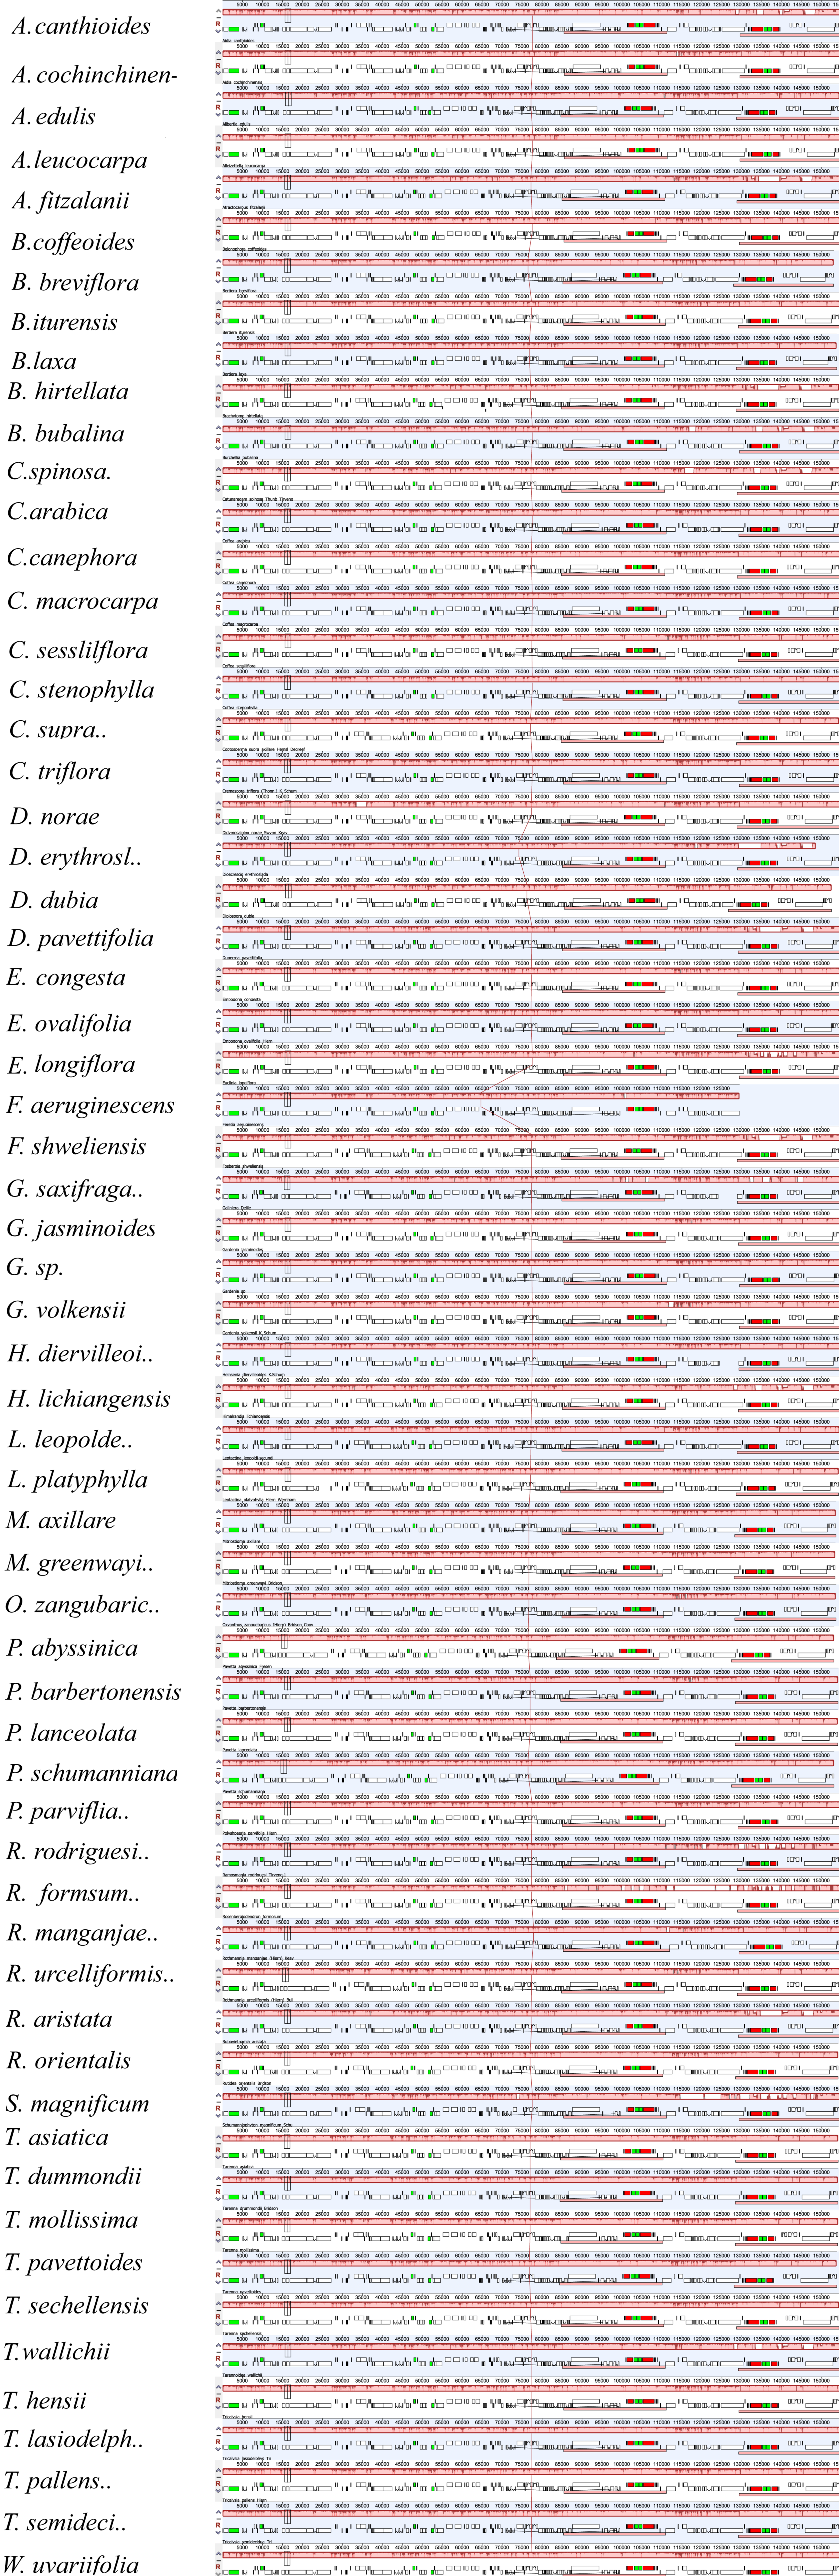

**Fig.S1.** The MAUVE alignment of the 62 coffeae alliance plastomes. The colliner blocks rearrangement of the accessible gene at junction of inverted repeat and small single copy .White colored blocks;protein coding gene,Black colored blocks:tRNA genes,Red colored blocks : rRNA.For interpretation of references to the colors ,see the web version of the article.
